# Supplementary material
Source: publisher figshare collection journal article supplement (https://future-science-group.figshare.com/ndownloader/files/30777214)
Supplement: Supplementary file 1 [file 30777214]

**Supplementary materials**

Supplementary Table 1. Patient baseline characteristics between Type A and Type B groups.

|  | **Type A** | **Type B** | **p-value** |
| --- | --- | --- | --- |
|  | **n=64** | **n=578** |  |
| Age, years, mean (SD) | 59.78 (12.17) | 60.25 (11.48) | 0.76 |
| Male, n (%) | 38 (59.4) | 320 (55.4) | 0.631 |
| Insurance type, n (%) |  |  |  |
| New Rural Cooperative Medical Care | 38 (59.4) | 289 (50.0) | 0.196 |
| Other | 26 (40.6) | 289 (50.0) |  |
| Comorbidities |  |  |  |
| Diabetes, n (%) | 6 (9.4) | 39 (6.7) | 0.601 |
| Hypertension, n (%) | 18 (28.1) | 99 (17.1) | 0.046 |
| Lung cancer, n (%) | 49 (76.6) | 484 (83.7) | 0.202 |
| Upper left lobe resection, n (%) | 7 (10.9) | 100 (17.3) | 0.263 |

p-values of categoric variables were calculated using the chi-square test and p-values of continuous variables were calculated using ANOVA. All p-values less than 0.05 were considered significant, and all analyses were conducted in R 3.5.1 (R Core Team, Vienna, Austria).

Supplementary Table 2. Difference in costs between hypertensive and non-hypertensive patients.

|  | **Non-hypertension** | **Hypertension** | **p-value** |
| --- | --- | --- | --- |
| Costs in USD | **n=525** | **n=117** |  |
| OMS cost, mean (SD) | 474.47 (216.48) | 457.55 (182.33) | 0.432 |
| Bed, mean (SD) | 112.36 (100.77) | 109.63 (63.88) | 0.779 |
| Nursing, mean (SD) | 77.1 (39.7) | 82.19 (43.1) | 0.218 |
| Laboratory, mean (SD) | 190.46 (137.48) | 200.28 (156.87) | 0.496 |
| Imaging, mean (SD) | 1169.6 (603.26) | 1252.24 (616.11) | 0.182 |
| Anaesthesia, mean (SD) | 241.64 (69.44) | 249.25 (86.22) | 0.307 |
| Miscellaneous, mean (SD) | 88.07 (77.71) | 90 (51.5) | 0.798 |
| Surgery, mean (SD) | 832.59 (227.33) | 857.19 (273.27) | 0.309 |
| Pharmacy, mean (SD) | 769.76 (604.68) | 800.77 (618.76) | 0.618 |
| Consultation, mean (SD) | 44.54 (23.88) | 45.46 (19.79) | 0.697 |
| Non-surgery treatment, mean (SD) | 273.71 (154.4) | 311.61 (222.88) | 0.029 |
